# Supplementary material
Source: MDPI journal article supplement (https://www.mdpi.com/2220-9964/6/3/85)
Supplement: s1 [file s1]

# Supplementary Material User-Generated Geographic Information for Visitor Monitoring in a National Park: A Comparison of Social Media Data and Visitor Survey

Vuokko Heikinheimo, Enrico Di Minin, Henrikki Tenkanen, Anna Hausmann, Joel Erkkonen and Tuuli Toivonen

Table S1. Place names of the surveyed sub-regions.

| Code | Sub-Region Name                   |
|------|-----------------------------------|
| A    | Kellostapuli-Kesänki-Kukastunturi |
| B    | Pallastunturi                     |
| C    | Pyhätunturi-Lainiotunturi         |
| D    | Hannunkuru                        |
| E    | Pyhäkero                          |
| F    | Vuontiskero                       |
| G    | Aakenustunturi                    |
| H    | Äkäskero                          |
| I    | Pallasjärvi                       |

The person collecting the forms will fill in this field

| turnon | polkka | kotelo | haukkipuu | post | neuvokas | paik | matkusta |
|--------|--------|--------|-----------|------|----------|------|----------|
|        |        |        |           |      |          |      |          |

## Pallas-Yllästunturi National Park

### Visitor Survey 2016

#### How to fill in this questionnaire:

The information collected by this Visitor Survey will be used in management and planning of the Pallas-Yllästunturi National Park. We hope that you answer to all the questions. Please note the following instructions:

1. Read the questions with care.
2. Answer the questions **personally** by ticking the appropriate circle (○). In multiple choice responses, tick all relevant boxes (□). In some questions, you will need to write your responses in a space reserved for it.
3. The questions are about your **current visit** to the Pallas-Yllästunturi National Park (map 1) and in some situations in the surrounding counties Kolari, Kittilä, Muonio or Enontekiö (map 2).
4. Please return the filled-in form to the person you got the form from
5. For more information, please contact Visitor centre Kellokas tel. +358 206 39 7039 (kellokas@metla.fi).

**THANK YOU IN ADVANCE!**

1. When did you arrive to the Pallas-Yllästunturi National Park (see map 1)?

date \_\_\_\_\_ and time of the day \_\_\_\_\_

2. How long did you stay or are going to stay during this visit...

a. in the Pallas-Yllästunturi National Park (see map 1)?  
about \_\_\_\_\_ days or \_\_\_\_\_ hours

b. **altogether** in the Pallas-Yllästunturi National Park or its vicinity: Kolari, Kittilä, Muonio and Enontekiö (see map 2)  
about \_\_\_\_\_ days or \_\_\_\_\_ hours

→ If your answer to the previous question (2b) was more than 1 day, how many times have you visited or will visit in the Pallas-Yllästunturi National Park during this trip?

\_\_\_\_\_ times

3. If you stayed or will stay overnight...

(if not applicable, please move on to question 4.)

a. ...in the Pallas-Yllästunturi National Park (see map 1),  
how many nights did you spend or will you spend in an open \_\_\_\_\_ a removable

wilderness hut \_\_\_\_\_ nights wilderness hut \_\_\_\_\_ nights  
your own \_\_\_\_\_ elsewhere,  
accommodation \_\_\_\_\_ where?  
(tent etc.) \_\_\_\_\_ nights \_\_\_\_\_ nights

b. ...in the vicinity of the Pallas-Yllästunturi National Park (see map 2), how many nights did you spend or will you spend in

a hotel \_\_\_\_\_ nights a rental cottage \_\_\_\_\_ nights

your own cottage \_\_\_\_\_ nights and trailer \_\_\_\_\_ nights

your own accommodation \_\_\_\_\_ elsewhere, where?  
(tent etc.) \_\_\_\_\_ nights \_\_\_\_\_ nights

I live in the area ☐

1

**10a. What do you think about the quality of the services, facilities and environment that you used during this visit in the Pallas-Yllastunturi National Park?**

Please respond to all alternatives you used during this visit. If you did not use the service or facility, please tick the alternative 'Did not use'.

(5 = very good, 4 = fairly good, 3 = neither, 2 = fairly poor, 1 = very poor)

|                                                                                                          | very<br>good          | 4                     | 3                     | 2                     | 1                     | very<br>poor          | did<br>not<br>use     |
|----------------------------------------------------------------------------------------------------------|-----------------------|-----------------------|-----------------------|-----------------------|-----------------------|-----------------------|-----------------------|
| parking places                                                                                           | <input type="radio"/> |
| road network                                                                                             | <input type="radio"/> |
| information boards on the route                                                                          | <input type="radio"/> |
| trail network                                                                                            | <input type="radio"/> |
| signposts at the trails                                                                                  | <input type="radio"/> |
| campfire sites and lean-to-shelters                                                                      | <input type="radio"/> |
| freewood at cabins and campfire sites                                                                    | <input type="radio"/> |
| public toilets                                                                                           | <input type="radio"/> |
| waste disposal (management and instructions)                                                             | <input type="radio"/> |
| paying attention to special needs (accessibility of routes, safety, signposting/information boards etc.) | <input type="radio"/> |
| leaflets and guide books                                                                                 | <input type="radio"/> |
| services of the national park in 2008 media                                                              | <input type="radio"/> |
| services of Pallas Visitor Centre                                                                        | <input type="radio"/> |
| services of Pallas Visitor Centre                                                                        | <input type="radio"/> |
| services of Irtanen-Lappi Visitor Centre                                                                 | <input type="radio"/> |
| availability of information beforehand                                                                   | <input type="radio"/> |
| services provided by enterprises (for example cabins and organized activities)                           | <input type="radio"/> |
| safety of the routes and structures                                                                      | <input type="radio"/> |
| general safety                                                                                           | <input type="radio"/> |
| general information                                                                                      | <input type="radio"/> |
| visibility of the landscape                                                                              | <input type="radio"/> |
| other, what?                                                                                             | <input type="radio"/> |

**12. On this trip, is Pallas-Yllastunturi National Park...**

☐ your trip's only or the most important destination?

☐ one among other intended destinations?

Other destinations are: \_\_\_\_\_

☐ a non-planned destination along your route?

Main destination(s) is/are: \_\_\_\_\_

**10b. How satisfied are you with the quantity of services and facilities in Pallas-Yllastunturi National Park as a whole?**

(5 = very satisfied, 4 = somewhat satisfied, 3 = neither, 2 = somewhat unsatisfied, 1 = very unsatisfied)

very satisfied ☐ 5 4 3 2 1 very unsatisfied

**13. Have you spent / Will you spend money on various activities in Pallas-Yllastunturi National Park or its vicinity while on this trip (see map 2)?**

☐ yes (→ please, move on following questions)

☐ no (→ please, move on to question 14)

I have lost the box that indicates whether you are estimating:  
☐ your personal expenses and your share of your group's joint expenses OR  
☐ the total expenses of your family or group.

☐ the visit is arranged by travel agency or other tour operator, the price of trip is \_\_\_\_\_ €

→ Please also inform your other costs in National park and surroundings below

Indicate below (points A=0) your total expenses for this trip in Pallas-Yllastunturi National Park and its vicinity.

Write 0 (zero) in the column if you have not spent any money on the activity in question.

| A) taxi or other purchases from the service station                                              | _____ € |
|--------------------------------------------------------------------------------------------------|---------|
| B) costs for local transportation (e.g. a local bus or car hire)                                 | _____ € |
| C) food and other retail shopping                                                                | _____ € |
| D) cafe and restaurant purchases                                                                 | _____ € |
| E) accommodation                                                                                 | _____ € |
| F) organised programme and recreational services (e.g. guided tours, entry fees and exhibitions) | _____ € |
| G) other expenses (e.g. equipment hire)                                                          | _____ € |

**11. Did this trip to Pallas-Yllastunturi National Park meet your expectations with regard to the following?**

(5 = very well, 4 = fairly well, 3 = neither, 2 = fairly poorly, 1 = very poorly)

|                                      | very<br>well          | 4                     | 3                     | 2                     | 1                     | very<br>poorly        |
|--------------------------------------|-----------------------|-----------------------|-----------------------|-----------------------|-----------------------|-----------------------|
| natural environment                  | <input type="radio"/> |
| opportunities for outdoor activities | <input type="radio"/> |
| routes and facilities                | <input type="radio"/> |

**14. How many times have you visited Pallas-Yllastunturi National Park before this trip?**

(please, answer on this app.)

This is my first visit ☐ → move on to question 15

During past five years \_\_\_\_\_ times

When was your first visit? In \_\_\_\_\_ (year)

When was your last visit? In \_\_\_\_\_ (year)

3

**4. Which part of the Pallas-Yllästunturi National Park (see map 1) did you visit this time?**  
(select more than one alternative if applicable)

- ☐ Kellostapuri-Kesälenkä-Puukautanen
- ☐ Pyhästunturi-Lainioitunturi
- ☐ Äärestunturi
- ☐ Alakivierä
- ☐ Pallasjärvi
- ☐ Pallasstunturi
- ☐ Vuontokierä
- ☐ Hannukivi
- ☐ Pyhäkierä
- ☐ elsewhere, where? \_\_\_\_\_

**7. During this visit to the Pallas-Yllästunturi National Park, your group mainly consists of...**  
(please, choose the most appropriate alternative)

- ☐ members of your own family
- ☐ other relatives
- ☐ friends
- ☐ co-workers
- ☐ a school class
- ☐ kindergarten children
- ☐ a student group
- ☐ senior citizens
- ☐ clients of guided tours
- ☐ club, association, etc.
- ☐ others, which? \_\_\_\_\_

**5a. Which means of transport did you use to travel from your home to the Pallas-Yllästunturi National Park?**  
(please, mark all the means of transport you used)

☐ car  
☐ car and trailer or mobile home  
☐ bus (public transport)  
☐ charter coach

☐ train  
☐ motorcycle  
☐ own power (walking, skiing, snowshoeing, cycling, etc.)

**9b** ☐ other, please specify? \_\_\_\_\_

**8. During this visit to the Pallas-Yllästunturi National Park, how important to you is or was...**  
(5 = very important, 4 = fairly important, 3 = neither, 2 = of little importance, 1 = not important at all)

|                                        | very important           | 4                        | 3                        | 2                        | 1                        | not at all important     |
|----------------------------------------|--------------------------|--------------------------|--------------------------|--------------------------|--------------------------|--------------------------|
| experiencing the nature                | <input type="checkbox"/> |
| scenery                                | <input type="checkbox"/> |
| being on your own                      | <input type="checkbox"/> |
| mental well-being                      | <input type="checkbox"/> |
| getting away from noise and pollution  | <input type="checkbox"/> |
| relaxation                             | <input type="checkbox"/> |
| meeting new people                     | <input type="checkbox"/> |
| being together with own group          | <input type="checkbox"/> |
| pleasant old memories                  | <input type="checkbox"/> |
| getting to know the area               | <input type="checkbox"/> |
| learning about the nature              | <input type="checkbox"/> |
| improving skills                       | <input type="checkbox"/> |
| exercising                             | <input type="checkbox"/> |
| existing experiences                   | <input type="checkbox"/> |
| learning about local cultural heritage | <input type="checkbox"/> |

**5b. Which of the means of transport mentioned above did you use last time?**  
(Write the number > \_\_\_\_\_)

**6. During this visit to Pallas-Yllästunturi National park, what is your group like?**  
I am alone ☐ → move on to question 8.  
the size of the group? (including yourself) \_\_\_\_\_ persons  
of which under 15 years of age? \_\_\_\_\_ persons

Please give the years of birth for  
under 15-years-olds.  
(If all are almost the same age, please  
give the most common year of birth.) \_\_\_\_\_

physically disabled? \_\_\_\_\_ persons

**9a. What did you do or will you do in Pallas-Yllästunturi National Park during this visit?**  
(please, select all which apply)

☐ walking  
☐ Nordic walking  
☐ jogging  
☐ hiking  
☐ observing nature  
☐ picnic  
☐ bird watching  
☐ picking wild berries

☐ picking mushrooms  
☐ studying plants  
☐ education  
☐ visiting visitor centre  
☐ nature photography  
☐ snowshoeing  
☐ orienteering  
☐ overnight camping outdoors

☐ cross-country skiing  
☐ downhill skiing  
☐ snowshoeing  
☐ hiking (staying overnight in nature)  
☐ guided tour  
☐ getting to know cultural heritage  
☐ getting to know geology  
☐ other, please specify? \_\_\_\_\_

**9b. Which of the alternatives you selected was or is the most important to you during this visit? number 1 to [ ]**

2

[illegible]

**Figure S1.** The survey form for the 2016 visitor survey in Pallas-Yllästunturi National Park conducted by Metsähallitus – Parks & Wildlife Finland.

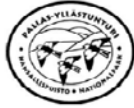

QUESTIONS ABOUT SOCIAL MEDIA USAGE (IN ENGLISH)

|                                                                                                                                                                                                                                                                                                                                                             |                                                                                                                                                                                                                                                                                                                                                                                                                                                                                                                                                                                                                                                                                                                      |
|-------------------------------------------------------------------------------------------------------------------------------------------------------------------------------------------------------------------------------------------------------------------------------------------------------------------------------------------------------------|----------------------------------------------------------------------------------------------------------------------------------------------------------------------------------------------------------------------------------------------------------------------------------------------------------------------------------------------------------------------------------------------------------------------------------------------------------------------------------------------------------------------------------------------------------------------------------------------------------------------------------------------------------------------------------------------------------------------|
| <p><b>B1. Are you a member of any social media platform?</b></p> <p><input type="radio"/> yes    <input type="radio"/> no (→ you can skip the rest)</p>                                                                                                                                                                                                     | <p><b>B7. Do you usually mark the location of your post?</b><br/>(choose the most appropriate alternative)</p> <p><input type="radio"/> with coordinates (GPS or similar)<br/><input type="radio"/> with place names<br/><input type="radio"/> with hashtags<br/><input type="radio"/> I don't share<br/><input type="radio"/> I don't know</p>                                                                                                                                                                                                                                                                                                                                                                      |
| <p><b>B2. Which social media platforms do you use?</b> (select more than one alternative if applicable)</p> <p><input type="checkbox"/> Facebook<br/><input type="checkbox"/> Instagram<br/><input type="checkbox"/> Twitter<br/><input type="checkbox"/> Flickr<br/><input type="checkbox"/> other(s), which? _____</p>                                    | <p><b>B8. How do you usually share your posts?</b><br/>(choose the most appropriate alternative)</p> <p><input type="radio"/> with friends (limited group) only<br/><input type="radio"/> to everyone, I have a public account<br/><input type="radio"/> it depends on the post /media<br/><input type="radio"/> I don't know</p>                                                                                                                                                                                                                                                                                                                                                                                    |
| <p><b>B3. Have you shared / Do you intend to share your experiences during this trip on social media?</b></p> <p><input type="radio"/> yes    <input type="radio"/> no</p>                                                                                                                                                                                  | <p><b>B9. What do you mainly post about in national parks?</b> (select more alternatives if applicable)</p> <p><input type="checkbox"/> weather or seasonality<br/><input type="checkbox"/> landscapes<br/><input type="checkbox"/> plants or vegetation<br/><input type="checkbox"/> animals<br/><input type="checkbox"/> landmarks<br/><input type="checkbox"/> built environment<br/><input type="checkbox"/> own activities (e.g. hiking/skiing)<br/><input type="checkbox"/> selfies<br/><input type="checkbox"/> other(s), what? _____</p>                                                                                                                                                                     |
| <p><b>B4. Which social media platform would you use for posts from the national park?</b> (select more than one alternative if applicable)</p> <p><input type="checkbox"/> Facebook<br/><input type="checkbox"/> Instagram<br/><input type="checkbox"/> Twitter<br/><input type="checkbox"/> Flickr<br/><input type="checkbox"/> other(s), which? _____</p> | <p><b>B10. What makes you post about your experiences while in nature?</b> (select more than one alternative if applicable)</p> <p><input type="checkbox"/> I liked or enjoyed something<br/><input type="checkbox"/> I didn't like something<br/><input type="checkbox"/> It was something funny<br/><input type="checkbox"/> I expected others to like it<br/><input type="checkbox"/> It was easy to spot or take a picture of<br/><input type="checkbox"/> It was something well known (land mark, charismatic species)<br/><input type="checkbox"/> It was something really rare or exceptional<br/><input type="checkbox"/> I wanted to share a feeling<br/><input type="checkbox"/> other(s), what? _____</p> |
| <p><b>B5. Which social media platform would you be <u>most likely</u> to using?</b> (select one alternative)</p> <p><input type="radio"/> Facebook<br/><input type="radio"/> Instagram<br/><input type="radio"/> Twitter<br/><input type="radio"/> Flickr<br/><input type="radio"/> muu, mikä _____</p>                                                     |                                                                                                                                                                                                                                                                                                                                                                                                                                                                                                                                                                                                                                                                                                                      |
| <p><b>B6. How often do you share something in social media?</b> (choose the most appropriate alternative)</p> <p><input type="radio"/> many times a day<br/><input type="radio"/> once every 1-2 days<br/><input type="radio"/> 1-2 times a week<br/><input type="radio"/> more seldom</p>                                                                  |                                                                                                                                                                                                                                                                                                                                                                                                                                                                                                                                                                                                                                                                                                                      |

Figure S2. Questions about social media usage in the visitor survey 2016.

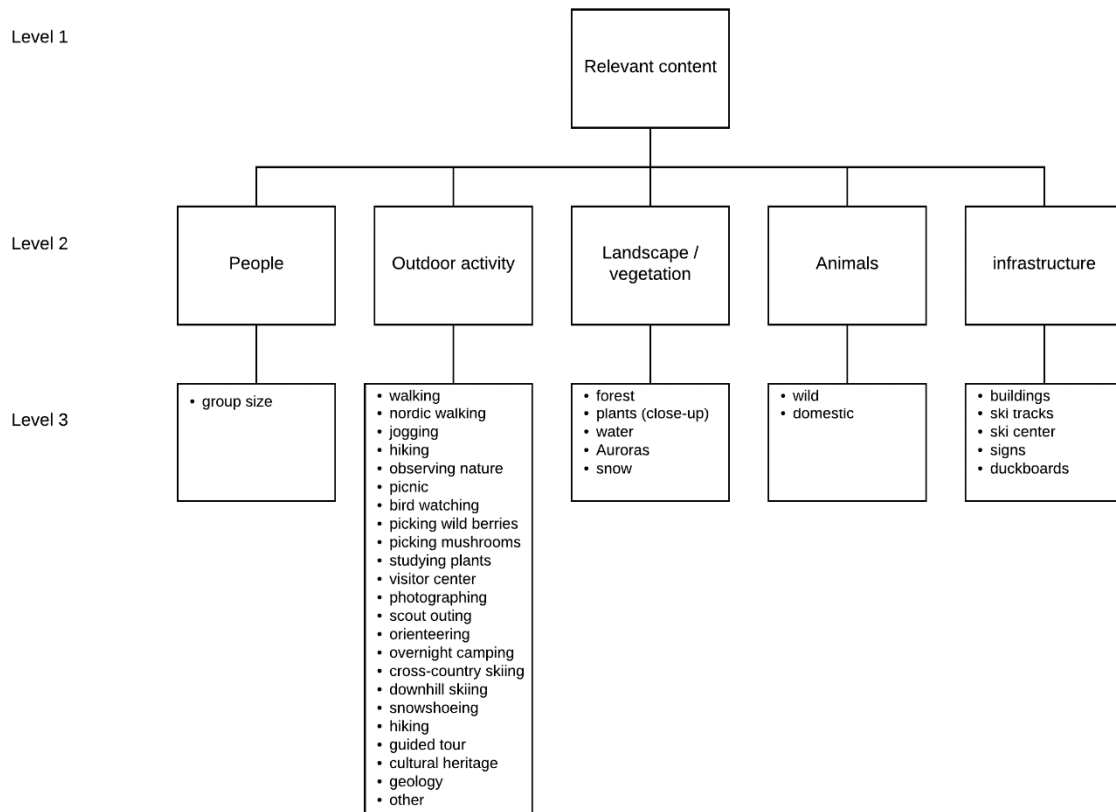

**Figure S3.** The classification scheme used to classify the pictures from the national park. One picture could be assigned to more than one category at each level.

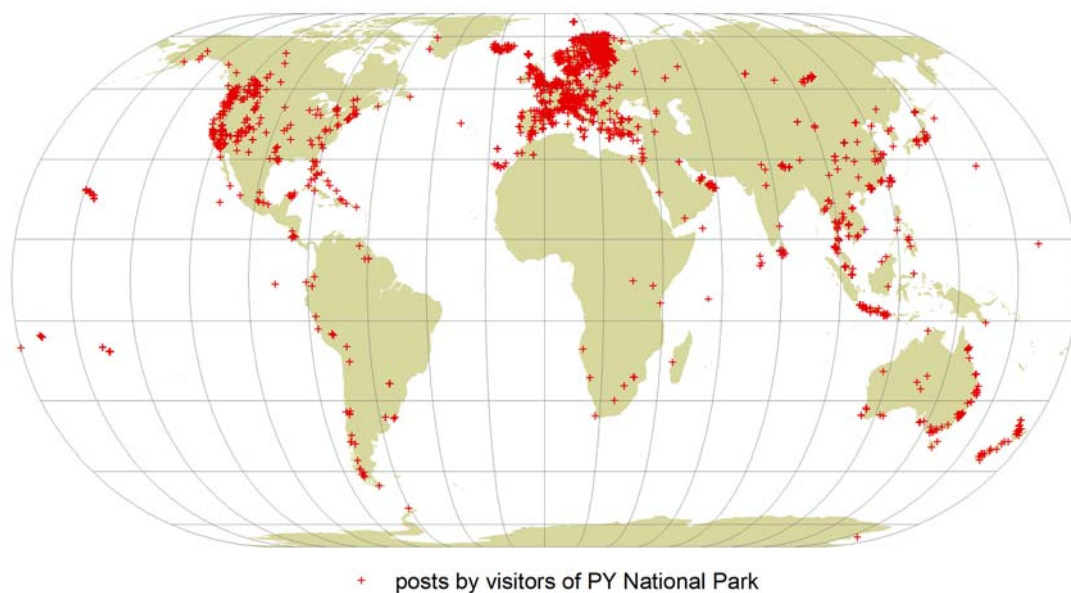

**Figure S4.** Geographical distribution of all pictures posted by the Instagram users who have posted from PY national park.
